# Supplementary material for: Toward one step analysis of cellular lipidomes using liquid chromatography coupled with mass spectrometry: application to Saccharomyces cerevisiae and Schizosaccharomyces pombe lipidomics
Source: Royal Society of Chemistry journal article supplement (doi:10.1039/b913353d), 2010-02-25
Supplement: b913353d.pdf [file b913353d.pdf]

**Supplementary Table 1. Multiple reaction monitoring (MRM) transitions of individual polar lipid species**

| Lipids      | MRM transitions | Lipids     | MRM transitions | Lipids            | MRM transitions |
|-------------|-----------------|------------|-----------------|-------------------|-----------------|
| LysoPI 12:1 | 513.5/241       | PS 32:0    | 734.7/647.6     | LysoPA20:1        | 463.4/153       |
| LysoPI 12:0 | 515.5/241       | PS 34:2    | 758.7/671.6     | PA30:2            | 615.7/153       |
| LysoPI 14:1 | 541.5/241       | PS 34:1    | 760.7/673.6     | PA30:1            | 617.7/153       |
| LysoPI 14:0 | 543.5/241       | PS 36:3    | 784.7/697.6     | PA32:2            | 643.7/153       |
| LysoPI 16:1 | 569.5/241       | PS 36:2    | 786.7/699.6     | PA32:1            | 645.7/153       |
| LysoPI 16:0 | 571.5/241       | PS 36:1    | 788.7/701.6     | PA34:2            | 671.7/153       |
| LysoPI 18:1 | 597.5/241       | LysoPE14:0 | 424.4/196.1     | PA34:1            | 673.7/153       |
| LysoPI 18:0 | 599.5/241       | LysoPE15:1 | 436.4/196.1     | PA36:2            | 697.7/153       |
| LysoPI 20:0 | 627.6/241       | LysoPE16:1 | 450.4/196.1     | PA36:1            | 699.7/153       |
| LysoPI 22:0 | 655.6/241       | LysoPE16:0 | 452.4/196.1     | PA36:0            | 701.7/153       |
| PI 20:0     | 669.6/241       | LysoPE17:1 | 464.4/196.1     | LysoPC14:1        | 450.4/168       |
| PI 22:1     | 695.6/241       | LysoPE18:1 | 478.5/196.1     | LysoPC14:0        | 452.4/168       |
| PI 24:1     | 723.7/241       | LysoPE18:0 | 480.5/196.1     | LysoPC16:1        | 478.4/168       |
| PI 24:0     | 725.7/241       | PE26:1     | 604.6/196.1     | LysoPC16:0        | 480.4/168       |
| PI 28:1     | 751.7/241       | PE28:1     | 632.6/196.1     | LysoPC18:1        | 506.5/168       |
| PI 28:0     | 753.7/241       | PE28:0     | 634.7/196.1     | LysoPC18:0        | 508.5/168       |
| PI 30:1     | 779.8/241       | PE29:0     | 648.7/196.1     | LysoPC20:1        | 534.5/168       |
| PI 30:0     | 781.8/241       | PE30:1     | 660.7/196.1     | LysoPC20:0        | 536.5/168       |
| PI 31:1     | 793.8/241       | PE30:0     | 662.7/196.1     | LysoPC22:1        | 634.5/168       |
| PI 32:2     | 805.8/241       | PE31:1     | 674.7/196.1     | LysoPC22:0        | 684.7/168       |
| PI 32:1     | 807.8/241       | PE31:2     | 676.7/196.1     | PC28:0            | 662.7/168       |
| PI 32:0     | 809.8/241       | PE32:2     | 686.7/196.1     | PC30:1            | 688.7/168       |
| PI 33:1     | 821.8/241       | PE32:1     | 688.7/196.1     | PC30:0            | 690.7/168       |
| PI 34:3     | 831.8/241       | PE34:2     | 714.7/196.1     | PC32:1            | 716.7/168       |
| PI 34:2     | 833.8/241       | PE34:1     | 716.7/196.1     | PC32:0            | 718.7/168       |
| PI 34:1     | 835.8/241       | PE36:3     | 740.7/196.1     | PC34:2            | 742.8/168       |
| PI 35:1     | 849.8/241       | PE36:2     | 742.7/196.1     | PC34:1            | 744.8/168       |
| PI 35:0     | 851.8/241       | PE36:1     | 744.7/196.1     | PC34:0            | 746.8/168       |
| PI 36:3     | 859.8/241       | PE37:1     | 758.7/196.1     | PC36:2            | 770.8/168       |
| PI 36:2     | 861.8/241       | PE38:2     | 770.8/196.1     | PC36:1            | 772.8/168       |
| PI 36:1     | 863.8/241       | PE38:1     | 772.8/196.1     | d18:1/20:0        | 592.7/308.4     |
| PI 36:0     | 865.8/241       | LysoPG16:1 | 481.5/153       | d18:1/20:0        | 628.7/308.4     |
| PI 37:1     | 877.8/241       | LysoPG16:0 | 483.5/153       | t18:1/20:0        | 608.7/324.4     |
| PI 38:1     | 891.8/241       | LysoPG18:1 | 509.5/153       | t18:1/20:0        | 644.7/324.4     |
| PI 38:0     | 893.8/241       | LysoPG18:0 | 511.5/153       | t18:1/26:0-B      | 692.9/408.5     |
| PI 40:2     | 917.8/241       | PG26:0     | 637.7/153       | t18:0/26:0-B      | 694.9/410.5     |
| PI 40:1     | 919.9/241       | PG28:1     | 663.7/153       | t18:0/26:0-C      | 710.9/426.5     |
| LysoPS 14:1 | 466.5/379.3     | PG30:0     | 665.7/153       | t18:0/26:0-C      | 746.9/426.5     |
| LysoPS 14:0 | 468.5/381.3     | PG30:1     | 691.7/153       | t18:0/26:0-D      | 726.9/402.5     |
| LysoPS 16:1 | 494.5/407.3     | PG30:0     | 693.7/153       | t18:0/26:0-D      | 726.9/442.5     |
| LysoPS 16:0 | 496.5/437.4     | PG32:1     | 719.7/153       | t18:0/26:0-D      | 762.9/402.5     |
| LysoPS 18:2 | 520.5/433.4     | PG32:0     | 721.7/153       | t20:0/26:0-C      | 738.9/454.6     |
| LysoPS 18:1 | 522.5/435.4     | PG34:2     | 745.7/153       | t20:0/26:0-C      | 774.9/454.6     |
| LysoPS 18:0 | 524.5/437.5     | PG34:1     | 747.7/153       | IPC t18:1/20:0    | 850.9/241       |
| PS 26:1     | 648.6/571.5     | PG34:0     | 749.7/153       | IPC(t18:0/24:0-B) | 908.9/241       |
| PS 26:0     | 650.6/573.5     | PG36:3     | 771.7/153       | IPC(t18:0/24:0-C) | 924.9/241       |
| PS 28:1     | 676.6/589.5     | PG36:2     | 773.7/153       | IPC(t18:0/26:0-B) | 936.9/241       |
| PS 28:0     | 678.6/591.5     | PG36:1     | 775.7/153       | IPC(t18:0/26:0-C) | 952.9/241       |
| PS 30:1     | 704.7/617.6     | LysoPA16:1 | 407.4/153       | IPC(t20:0/26:0-B) | 964.9/241       |
| PS 30:0     | 706.7/619.6     | LysoPA16:0 | 409.4/153       | IPC(t18:0/26:0-D) | 968.9/241       |
| PS 32:2     | 730.7/643.6     | LysoPA18:1 | 435.4/153       | IPC(t20:0/26:0-C) | 980.9/241       |
| PS 32:1     | 732.7/645.6     | LysoPA18:0 | 437.4/153       |                   |                 |
